# Supplementary material for: Green remediation of textile dyes containing wastewater by Ipomoea hederifolia L.
Source: Royal Society of Chemistry journal article supplement (doi:10.1039/c4ra06840h), 2014-01-01
Supplement: c4ra06840h1.pdf [file c4ra06840h1.pdf]

| Sr. No. | Structure and name of the dye                      |
|---------|----------------------------------------------------|
| 1.      | <p data-bbox="375 457 513 489">Scarlet RR</p>      |
| 2.      | <p data-bbox="375 699 591 730">Navy Blue HE2R</p>  |
| 3       | <p data-bbox="375 1024 540 1056">Green HE4B</p>    |
| 4       | <p data-bbox="375 1455 480 1486">Blue 2R</p>       |
| 5       | <p data-bbox="375 1654 557 1686">Direct Red 5B</p> |
| 6       |                                                    |

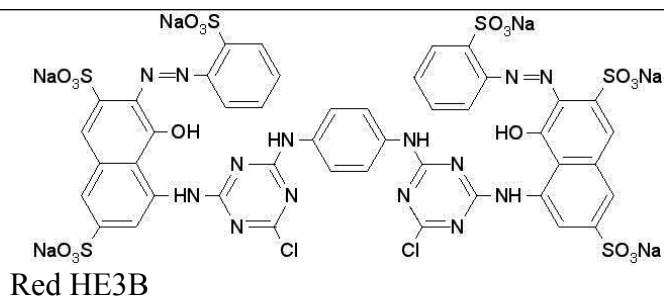

7

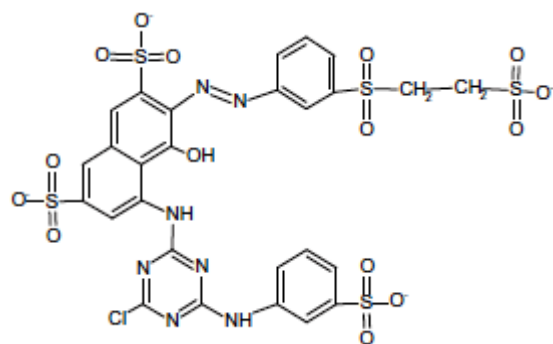

8

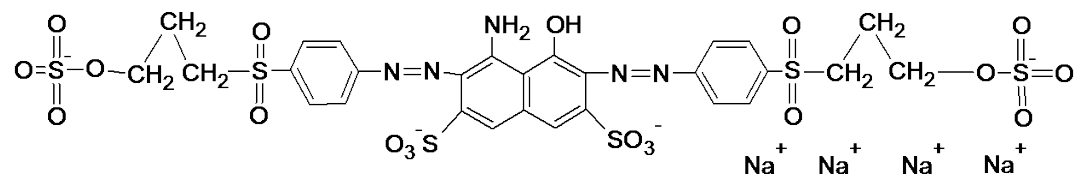

#### Standard protocol for use of Instruments:

All the instruments used are maintained for their performance every six months.

All experiments were performed with standard controls where ever necessary.

All the time appropriate controls were used.

Valid methods (references given) are used for experimentation.

Instruments are standardized and calibrated before use.
